# Supplementary material
Source: publisher site journal article supplement (https://www.dovepress.com/get_supplementary_file.php?f=316371.docx)
Supplement: Supplementary file 1 [file get_supplementary_file.php]

**Effects of wearable transcutaneous electrical nerve stimulation on fibromyalgia: A randomized controlled trial**

Robert N Jamison1

Robert R. Edwards1

Samantha Curran1

Limeng Wan1

Edgar L. Ross1

Christopher Gilligan1

Shai N. Gozani2

1Department of Anesthesiology, Perioperative and Pain Medicine, Harvard Medical School,

Brigham & Women’s Hospital, Chestnut Hill, MA, USA

2NeuroMetrix, Inc. Woburn, MA, USA

Correspondence: Shai N. Gozani, MD, PhD

NeuroMetrix, Inc.

4b Gill St., Woburn, MA 01801, USA

Tel +1 781 314 2789

Fax +1 781 890 1556

Email gozani@neurometrix.com

**Supplemental Table 1** Analgesic medication use collected through weekly phone interviews

|  | **Sham** | | **Active** | |
| --- | --- | --- | --- | --- |
| **Week** | **Responses** | **Pain Medication Use (%)** | **Responses** | **Pain Medication Use (%)** |
| 1 | 55 | 56.4 | 60 | 61.7 |
| 2 | 53 | 62.3 | 60 | 50.0 |
| 3 | 52 | 57.7 | 58 | 58.6 |
| 4 | 52 | 57.7 | 53 | 54.7 |
| 5 | 49 | 55.1 | 54 | 55.6 |
| 6 | 48 | 56.3 | 52 | 53.9 |
| 7 | 46 | 63.0 | 50 | 54.0 |
| 8 | 41 | 63.4 | 48 | 58.3 |
| 9 | 41 | 56.1 | 45 | 55.6 |
| 10 | 37 | 54.1 | 41 | 61.0 |
| 11 | 29 | 58.6 | 37 | 62.2 |
| 12 | 19 | 57.9 | 21 | 57.1 |
| 13 | 8 | 50.0 | 6 | 50.0 |
| **Notes**: Table shows the percentage of subjects who self-reported taking analgesic medications in the past week based on the weekly phone interviews. Responses column indicates the number of subjects that were interviewed in the given week. Analgesics medications include OTC analgesics, prescription NSAIDS, neuroleptics, antidepressants, opioids and other lesser used categories (e.g., muscle relaxants). There was no discernable change over the course of the study and there was no significant difference between the treatment groups for any week. | | | | |

**Supplemental Table 2** TENS utilization and simulation data

|  |  | **Treatment** | |  |
| --- | --- | --- | --- | --- |
|  | **All Subjects (N=119)** | **Sham**  **(n=57)** | **Active**  **(n=62)** | **p-value** |
| **Utilization** |  |  |  |  |
| Sessions per day | 3.5 (2.4) | 3.4 (2.6) | 3.7 (2.3) | 0.475 |
| Sessions per day, median (IQR) | 3.0 (1.9, 4.9) | 2.8 (1.6, 4.3) | 3.0 (1.9, 5.3) | 0.384 |
| Daily use (days) | 68.9 (27.1) | 65.9 (30.3) | 71.7 (23.7) | 0.244 |
| Overnight use (days) | 23.7 (23.4) | 21.5 (21.5) | 25.6 (25.0) | 0.344 |
| **Stimulation** |  |  |  |  |
| Sensation threshold (mA)* | 8.1 (5.0) | 8.2 (5.1) | 7.9 (4.9) | 0.761 |
| Stimulation intensity (mA)* | 14.9 (9.7) | 14.3 (8.9) | 15.5 (10.4) | 0.504 |
| Intensity ratio*† | 1.9 (0.9) | 1.7 (0.1) | 2.1 (1.3) | 0.016 |
| **Notes**: Data reported as mean (SD) unless indicated; P-value from t-test or Wilcoxon rank-sum test (for median sessions per day) comparing sham and active groups; session is 1-hour of therapy with stimulation for 60 minutes (active) or 6 minutes (sham); Daily use, number of days (24-hour period) with at least 1 session; Overnight use, number of nights device was worn; Intensity ratio, ratio of stimulation intensity to sensation threshold; Sensation threshold and stimulation intensity are median value over study period; *N=117 for all subjects and n=60 for active group because no stimulation data recorded for 2 active subjects; †Significant group difference attributable to automated compensation in the active device for nerve desensitization to continuous stimulation.  **Abbreviations**: SD, standard deviation; IQR, intra-quartile range; mA, milliamperes. | | | | |

**Supplemental Table 3** Sensitivity analysis for mean changes in efficacy measures from baseline to 3-months using reference-based multiple imputation (jump-to-reference method) with 200 imputations

|  |  | **Mean Change** |  | **Treatment Comparison**  **(Active - Sham)** | | |
| --- | --- | --- | --- | --- | --- | --- |
| **Measure** | **N** | **SE** | **Difference** | **95% CI** | **p-value** |
| FIQR total score |  |  |  |  |  |  |
| Sham | 57 | -6.84† | 1.97 |  |  |  |
| Active | 62 | -13.49‡ | 1.74 | -6.64 | -11.70, -1.59 | 0.010 |
| FIQR pain item |  |  |  |  |  |  |
| Sham | 57 | -1.17‡ | 0.2 |  |  |  |
| Active | 62 | -1.70‡ | 0.2 | -0.52 | -1.11, 0.07 | 0.083 |
| FIQR sleep quality item |  |  |  |  |  |  |
| Sham | 57 | -0.63 | 0.33 |  |  |  |
| Active | 62 | -1.54‡ | 0.30 | -0.91 | -1.80, 0.02 | 0.045 |
| BPI severity |  |  |  |  |  |  |
| Sham | 57 | -0.93‡ | 0.17 |  |  |  |
| Active | 62 | -1.26‡ | 0.19 | -0.33 | -0.83, 0.17 | 0.190 |
| BPI interference |  |  |  |  |  |  |
| Sham | 57 | -1.11‡ | 0.23 |  |  |  |
| Active | 62 | -1.74‡ | 0.23 | -0.64 | -1.27, -0.1 | 0.046 |
| PDQ |  |  |  |  |  |  |
| Sham | 57 | -0.14 | 0.16 |  |  |  |
| Active | 62 | -1.80† | 0.55 | -1.66 | -3.24, 0.07 | 0.040 |
| PDI |  |  |  |  |  |  |
| Sham | 57 | -3.47† | 1.38 |  |  |  |
| Active | 62 | -6.64‡ | 1.23 | -3.17 | -6.76, 0.43 | 0.084 |
| HADS |  |  |  |  |  |  |
| Sham | 57 | -0.94 | 0.60 |  |  |  |
| Active | 62 | -2.21‡ | 0.56 | -1.28 | -2.93, 0.37 | 0.129 |
| PCS |  |  |  |  |  |  |
| Sham | 57 | -4.23‡ | 0.95 |  |  |  |
| Active | 62 | -4.01‡ | 0.85 | 0.22 | -2.29, 2.73 | 0.866 |
| **Notes**: †Significant within group improvement at p<0.05; ‡Significant within group improvement at p<0.001.  **Abbreviations**: SE, standard error; CI, confidence interval; FIQR, Fibromyalgia Impact Questionnaire Revised; BPI, Brief Pain Inventory; PDQ, painDETECT questionnaire; PDI, Pain Disability Index; HADS, Hospital Anxiety and Disability Scale; PCS, Pain Catastrophizing Scale. | | | | | | |

**Supplemental Table 4** Adverse events

| **Number of Events** | **Description** | **Active / Sham** | **Relationship to Device Use** |
| --- | --- | --- | --- |
| 6 | Mild self-limited rash at the site of device placement | 3 Active, 3 Sham | Definite |
| 1 | Hot flashes, resolved when discontinued | Sham | Possible |
| 1 | Numbness and tingling below both knees, resolved when discontinued | Active | Possible |
| 1 | Muscle cramps, resolved when discontinued | Sham | Possible |
| 1 | Frequent hospital visits due to increased pain | Sham | Unrelated |
| 1 | Elevated blood pressure requiring emergency room visit and hospital admittance for overnight observation | Active | Unrelated |
| 1 | Fall leading to wrist fracture | Sham | Unrelated |
| **Notes**: Relationship to device used based on principle investigator assessment. | | | |
